# Supplementary material for: Redirected charge transport arising from diazonium grafting of carbon coated LiFePO4
Source: Royal Society of Chemistry journal article supplement (doi:10.1039/c4cp03174a), 2014-09-04
Supplement: c4cp03174a1.pdf [file c4cp03174a1.pdf]

## Supplementary information

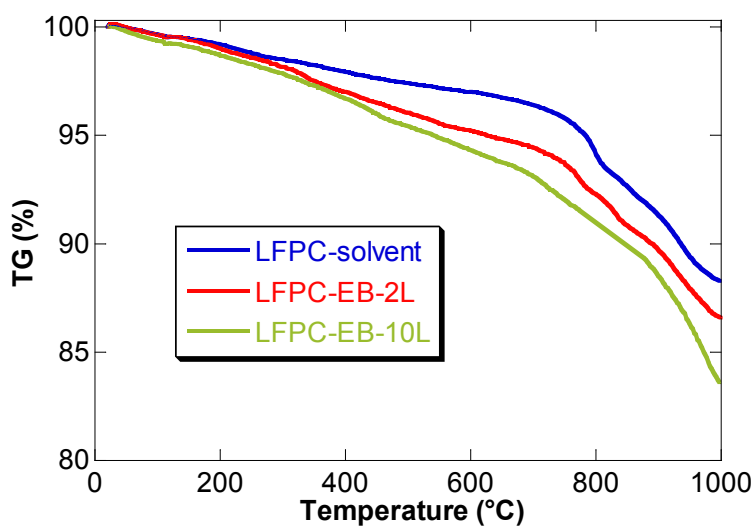

**Figure S1.** Thermogravimetric curves of LFPC-solvent, LFPC-EB-2L and LFPC-EB-10L.

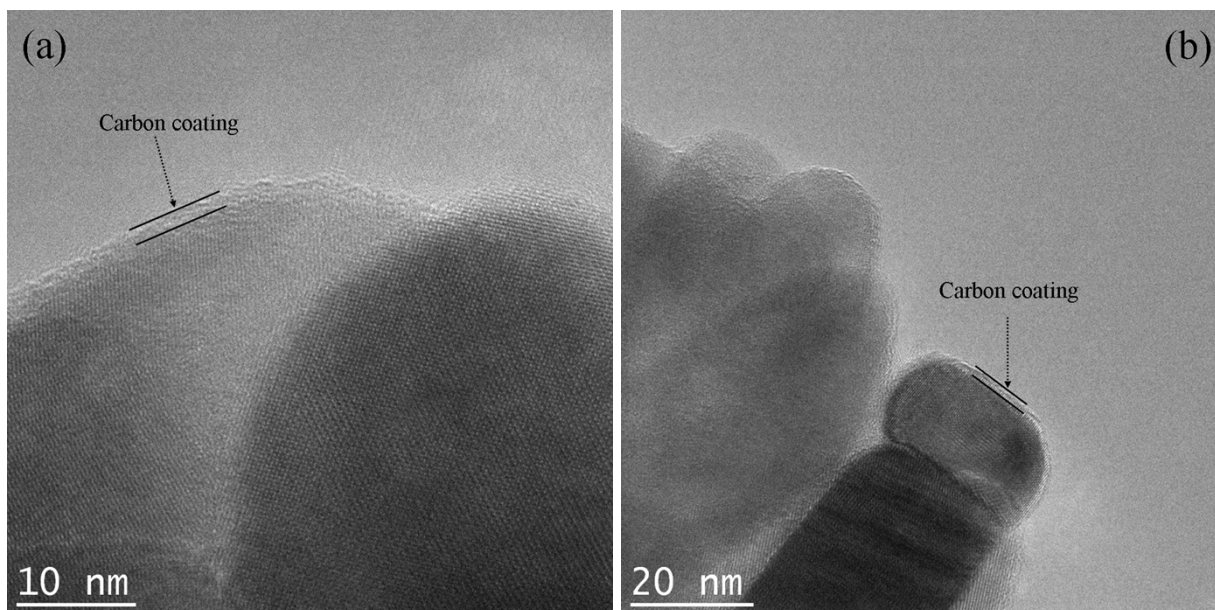

**Figure S2.** HRTEM images of (a and b) pristine LFPC.

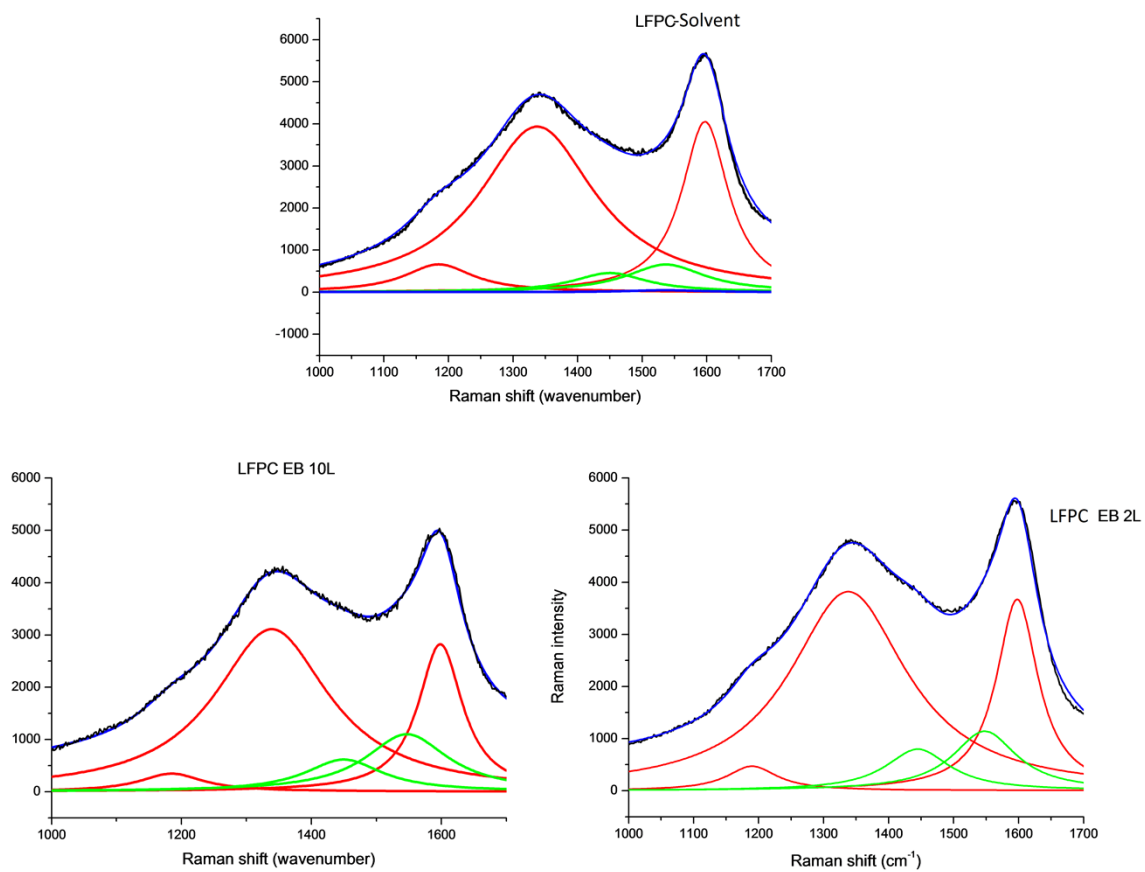

**Figure S3.** Comparison of the decomposition of the three Raman spectra excited at 633 nm obtained for LFPC-solvent, LFPC-EB-2L and LFPC-EB-10L.
